# Supplementary material
Source: publisher site journal article supplement (https://www.dovepress.com/article/606052)
Supplement: Supplementary file 1 [file 606052%20Supplementary%20Material.docx]

Section 1. Pre-Course information

Supplementary Table 1. Students pre-course survey

|  | Count / % (95% CI) |
| --- | --- |
| Rate your current level of knowledge in biostatistics. | |
| 1 — Very low | 2/2.7 (0.0;6.4) |
| 2 — Low | 5/6.8 (1.0;12.6) |
| 3 — Moderate | 23/31.5 (20.9;42.1) |
| 4 — Good | 24/32.9 (22.1;43.7) |
| 5 — Very good | 19/26 (15.9;36.1 |
| Which topics in biostatistics do you find most difficult? (you can select multiple options) | |
| descriptive statistics | 11/15.1 (6.9;23.3) |
| p-value and statistical hypothesis testing | 22/30.1 (19.6;40.7) |
| confidence intervals | 15/20.5 (11.3;29.8) |
| selection and interpretation of statistical criteria | 15/20.5 (11.3;29.8) |
| correlation | 22/30.1 (19.6;40.7) |
| linear and logistic regression | 20/27.4 (17.2;37.6) |
| survival analysis (Kaplan-Meier curves | 32/43.8 (32.5;55.2) |
| sensitivity and specificity | 16/21.9 (12.4;31.4) |
| sample size and study power | 16/21.9 (12.4;31.4) |
| interpretation of statistical results in articles | 20/27.4 (17.2;37.6) |
| What hinders you most in learning biostatistics? | |
| A large number of formulas | 13/17.8 (9.0:26.6) |
| Not enough examples from medicine and clinical practice | 5/6.8 (1.0:12.6) |
| Complex and incomprehensible terms | 9/12.3 (4.8:19.9) |
| Difficult calculations | 7/9.6 (2.8:16.4) |
| Too much theory, not enough practice | 7/9.6 (2.8:16.4) |
| The material is presented in a boring way | 4/5.5 (0.2:10.7) |
| It is difficult to understand how it will be useful in future profession | 11/15.1 (6.9:23.3) |
| The pace of explanation is too fast | 5/6.8 (1.0:12.6) |
| Lack of visual diagrams, tables, and graphs | 4/5.5 (0.2:10.7) |
| Fear of making mistakes in calculations | 7/9.6 (2.8:16.4) |
| Which format for studying biostatistics is most convenient for you? (you can select multiple options) | |
| short video lectures with formula analysis | 31/42.5 (31.1;53.8) |
| text summaries with explanations in simple language | 17/23.3 (13.6;33.0) |
| biostatistics problems with step-by-step analysis | 31/42.5 (31.1;53.8) |
| examples of calculations based on medical data | 18/24.7 (14.8;34.6) |
| interactive graphs and tables for interpreting results | 12/16.4 (7.9;24.9) |
| analysis of typical errors in statistical calculations | 16/21.9 (12.4;31.4) |
| practical assignments (independent + analysis) | 16/21.9 (12.4;31.4) |
| combined format (video + practice + examples) | 18/24.7 (14.8;34.6) |
| How much time are you willing to spend studying one module on biostatistics? | |
| up to 30 minutes | 18/24.7 (14.8;34.5) |
| 45–60 minutes | 24/32.9 (22,1;43.6) |
| 1–1.5 hours | 20/27.4 (17.2;37.6) |
| about 2 hours | 7/9.6 (2.8;16.4) |
| more than 2 hours (if the material is practice-oriented) | 8/4.1 (0;8.7) |
| Would you like the next topic on biostatistics to be unlocked only after you have successfully passed the previse one? | |
| Yes | 29/39.7 (28.5;50.9) |
| No | 20/27.4 (17.2;37.6) |
| Not sure | 25/34.2 (23.3;45.1) |

Section 2. Student focus group scenario

1. Introduction and General Impressions (10–15 min)

Key Question: What did you like or dislike about the completed course modules? How did they meet your expectations for a biostatistics course?

Probing Question: Which modules were the most interesting/challenging? Why?

How suitable is the course for self-study or group study?

2. Learning Outcomes (10 min)

Key Question: How clearly and understandably were the learning objectives formulated in each module? Did they help you understand what to expect and what to master?

Probing Question: Were the objectives achievable? Provide examples. What could be changed in the wording to make them more motivating or specific?

3. Theoretical Material (Text, Video, Problems, Clinical Cases) (15 min)

Key Question: How useful and understandable was the theoretical material? What helped you best grasp the theory (text, video, problems, or cases)? Clarifying:

Videos: Were they short enough? Were they informative and visually appealing?

Clinical cases: How close were they to real-life biostatistics? Did they help you apply the theory in practice? What should be added/removed?

4. Problem Set (10 min)

Key question: How interesting and relevant were the problems in the Problem Set? Was it easy to work individually or in a group?

Clarifying: Difficulty: Were the problems too easy/difficult? Provide examples. Was the case-based approach convenient? What could be improved for group work? Did the problems help reinforce the material?

5. AI Assistant (integrated AI for assistance) (15 min)

Key question: How often did you use the AI assistant? How helpful was it in analyzing the material or problems?

Clarifying: Accuracy: Were there any errors in the AI's answers (e.g., incorrect calculations or explanations)? What can be done about them? Was it easy to formulate the AI's questions? Was there enough feedback? Did you feel like you were "offloading" all the work onto the AI without your own understanding? What should be added?

6. Formative Quiz (10 min)

Key Question: How helpful was the quiz in testing your knowledge? Was it convenient to take it with multiple attempts and instant feedback?

Clarifying Questions: Mastery Threshold: Was it easy to achieve ≥80%? Did it motivate you to continue studying? Was the feedback detailed enough? Did it help you understand your mistakes? What should be changed in the questions?

7. Final Recommendations (5–10 min)

Key Question: What would you change in the modules right now? What are your general suggestions for improving the course?

Supplementary Figure 1. Student Answer Checklist (answers samples)

Section 3. Developer focus group scenario

1. General Questions about the Module and SAM Compliance (10–15 min): Does the current prototype adhere to SAM principles? Has Savvy Start achieved its goal—have we quickly prototyped key ideas, or is it still too linear? What risks/limitations do we see at this stage? How adaptive is the module (flexible to changes based on future student feedback/analytics)?

2. Learning Outcomes (5–10 min): Are the goals sufficiently specific, measurable, and action-oriented? Do the outcomes align with the real needs of the audience? Is there alignment between the outcomes and the other components?

3. Theoretical Material (5–10 min): How balanced is the material in terms of length and complexity?

4. Clinical Case Studies (5–10 min): How relevant and authentic are they (real-world bio-stats examples)? Are there any technical issues in Moodle? What could be simplified/removed/added to increase engagement?

5. Problem Set (case-based tasks) (10 min) Are the tasks sufficiently case-based and practical? Is group work supported? Is there a balance between challenge and frustration? How are the tasks related to the AI ​​assistant (should the AI ​​help or just check)?

6. AI Assistant (15 min): How accurate and secure are the AI ​​prompts? Is the AI ​​explainable enough (does the AI ​​explain its steps, not just provide an answer)? How can we avoid overreliance on students? What should be added (personalization, query logging for analytics)?

7. Formative Quiz (10 min): Are the questions varied? Is the feedback immediate and helpful (not just "right/wrong," but explanations)? Is the mastery threshold ≥80% realistic? Should it be adapted to student groups? Do multiple attempts motivate, rather than allow students to "guess"? 8. Iteration wrap-up questions (10–15 min): What should we leave as is (strong points)? What are the top 3 priorities for the next iteration (what to fix first)? What metrics will we track after the pilot (quiz scores, time on task, AI usage)? Are we ready to move on to the next cycle (Beta → Gold) or do we need another Alpha?

Supplementary Figure 2. Checklist for developers

Supplementary Table 2. Structured framework for SAM-based module readiness assessment

| No. | Criterion | Operational Definition | Scoring Rubric (1–5) |
| --- | --- | --- | --- |
| A. Prototype & Instructional Design Quality | | | |
| A1 | Overall Prototype Integrity | Completeness of module structure and components | 1 = incomplete; 3 = structurally complete but inconsistent; 5 = fully coherent and integrated |
| A2 | Iterative Consistency with SAM | Evidence of documented iteration cycles and refinements | 1 = no iteration evidence; 3 = one iteration; 5 = ≥2 documented refinement cycles |
| A3 | Learning Outcomes Quality | Clarity, measurability, Bloom’s taxonomy alignment | 1 = vague; 3 = measurable but misaligned; 5 = measurable & taxonomy-consistent |
| A4 | Constructive Alignment | Degree to which outcomes, theory, activities, and assessment correspond | 1 <60%; 3 = 70–79%; 5 ≥90% |
| B. Content & Learning Activities | | | |
| B1 | Theoretical Material Quality | Scientific accuracy, clarity, structure | 1 = major inaccuracies; 3 = acceptable; 5 = high academic quality |
| B2 | Video Quality | Length (5–10 min), clarity, engagement | 1 = poor quality; 3 = acceptable; 5 = optimal length & engaging |
| B3 | Tasks | Interactivity, randomization, usability | 1 = non-functional; 3 = partially functional; 5 = fully stable & pedagogically sound |
| B4 | Clinical Case Relevance | Authenticity and curricular alignment | 1 = irrelevant; 3 = moderately relevant; 5 = highly authentic |
| B5 | Problem Set Design | Case-based complexity and balance | 1 = recall only; 3 = mixed levels; 5 = analysis/synthesis dominant |
| B6 | Group Work Support | Structured collaborative design | 1 = absent; 3 = limited; 5 = clearly scaffolded |
| C. AI Assistant Integration | | | |
| C1 | AI Accuracy | Correctness of responses | 1 = frequent hallucinations; 3 = minor inaccuracies; 5 = highly reliable |
| C2 | Explainability | Transparency and reasoning clarity | 1 = opaque; 3 = partially explained; 5 = clear reasoning provided |
| C3 | Stability & Integration | Technical integration within LMS | 1 = unstable; 3 = minor issues; 5 = fully stable |
| C4 | Over-Reliance Mitigation | Presence of reflective prompts and safeguards | 1 = none; 3 = partial; 5 = explicit mitigation strategy |
| D. Formative Assessment Quality | | | |
| D1 | Question Diversity | Variety of item formats | 1 = single type; 3 = limited variety; 5 = multiple formats |
| D2 | Feedback Quality | Specificity and instructional value | 1 = generic; 3 = partially specific; 5 = detailed & corrective |
| D3 | Mastery Threshold Logic | ≥80% rule functioning | 1 = not implemented; 3 = partially enforced; 5 = fully automated |
| E. Readiness for Transition | | | |
| E1 | Stakeholder Satisfaction | Mean evaluation score | 1 <50%; 3 = 60–69%; 5 ≥85% |
| E2 | Technical Stability | Error-free operation | 1 = critical errors; 3 = minor bugs; 5 = fully stable |
| E3 | Usability | Learner-perceived clarity | 1 = confusing; 3 = acceptable; 5 = intuitive |
| E4 | Pilot Learning Metrics | Mastery ≥70–75% | 1 = <60%; 3 = 65–69%; 5 ≥80% |
| E5 | Iteration Backlog Defined | Documented improvement list | 1 = absent; 3 = informal; 5 = structured top-3–5 list |
| Anchor descriptors were provided for scores 1, 3, and 5. Intermediate values (2 and 4) represented gradations between adjacent anchor levels. | | | |

Section 4. Electronic course with AI component assessment

Supplementary Table 3. Students’ opinions about biostatistics electronic course with AI

|  | Count / % (95% CI) |
| --- | --- |
| The course helped to better understand biostatistics |  |
| 1 — Strongly disagree | 9/4.2 (1.5;6.9) |
| 2 — Disagree | 9/4.2 (1.5;6.9) |
| 3 — I can't say/find it difficult to answer | 58/27 (21.0;32.9) |
| 4 — I agree | 86/40 (33.5;46.6) |
| 5 — I totally agree | 53/24.7 (18.9;30.4) |
| The 80% threshold format motivated repetition of the material (The higher the score. the more the format motivated repetition of the material.) |  |
| 1 — Strongly disagree | 11/5.1(2.2;8.1) |
| 2 — Disagree | 15/7.0(3.6;10.4) |
| 3 — I can't say/find it difficult to answer | 59/27.4(21.5;33.4) |
| 4 — I agree | 79/36.7(30.3;43.2) |
| 5 — I totally agree | 51/23.7(18.0;29.4) |
| The course is more convenient than traditional lectures and textbooks. |  |
| 1 — Strongly disagree | 11/5.1 (2.2;8.1) |
| 2 — Disagree | 15/7.0 (3.6;10.4) |
| 3 — I can't say/find it difficult to answer | 60/27.9 (21.9;33.9) |
| 4 — I agree | 80/37.2 (30.8;43.7) |
| 5 — I totally agree | 49/22.8 (17.2;28.4) |
| The module material is relevant for clinical practice and exam preparation. |  |
| 1 — Strongly disagree | 10/4.7(1.8;7.5) |
| 2 — Disagree | 7/3.3 |
| 3 — I can't say/find it difficult to answer | 69/32.1 (25.9;38.3) |
| 4 — I agree | 83/38.6 (32.1;45.1) |
| 5 — I totally agree | 46/21.4 (15.9;26.9) |
| I recommend this course to other students. |  |
| 1 — Strongly disagree | 6/2.8 (0.6;4.9) |
| 2 — Disagree | 14/6.5 (3.2;9.8) |
| 3 — I can't say/find it difficult to answer | 62/28.8 (22.8;34.9) |
| 4 — I agree | 83/38.6 (32.1;45.1) |
| 5 — I totally agree | 50/23.3 (17.6;28.9) |

Section 5. The Use of Artificial Intelligence in an Electronic COURSE on Biostatistics

Supplementary Table 4. Students’ opinions about AI component

|  | Count / % (95% CI) |
| --- | --- |
| *Have you used the AI component of the Biostatistics e-textbook?* | |
| Yes | 70/56,9 (48.1;65.7) |
| No | 53/43,1 (34.3;51.8) |
| Once | 33/26,8 (19.0;34.7) |
| Periodically | 69/56,1 (47.3;64.9) |
| Regularly | 16/13 (7.1;18.9) |
| Almost every lesson | 5/4,1 (0.6;7.5) |
| *What tasks did you use the AI component for? (multiple options)* | |
| Explanation of theoretical material | 64/52 (43.2;60.9) |
| Analysis of formulas and statistical indicators | 58/47,2 (38.3;55.9) |
| Help with solving problems | 41/33,3 (25;41.7) |
| Interpretation of statistical results | 30/24,4 (16.8;31.9) |
| Preparation for tests/exams | 34/27,6 (19.7;35.5) |
| 1 — Does not help at all | 8/6,5 (2.1;10.8) |
| 2 — Helps slightly | 12/9,8 (4.5;15.0) |
| 3 — Helps moderately | 49/39,8 (31.2;48.5) |
| 4 — Helps significantly | 38/30,9 (22.7;39.1) |
| 5 — Helps very much | 16/13 (7.1;18.9) |
| Significantly improved | 55/44,7 (35.9;53.5) |
| Slightly improved | 46/37,4 (28.9;45.9) |
| No change | 22/17,9 (11.1;24.7) |
| *Does using AI increase your motivation to learn?* |  |
| Yes | 66/53,7 (44.9;62.5) |
| No | 22/17,9 (11.1;24.7) |
| Difficult to answer | 35/28,5 (20.5;36.4) |
| *Rate the clarity of explanations provided by the AI component:* | |
| 1 Completely incomprehensible | 8/6,5 (2.1;10.8) |
| 2 Mostly incomprehensible | 10/8,1 (3.3;12.9) |
| 3 Partially understandable | 37/30,1 (21.9;38.2) |
| 4 Mostly understandable | 43/35 (26.5;43.4) |
| 5 Completely understandable | 25/20,3 (13.2;27.4) |
| Always correct | 13/10,6 (5.1;16.0) |
| Mostly correct | 66/53,7 (44.9;62.5) |
| Sometimes contained errors | 36/29,3 (21.2;37.3) |
| Often contained errors | 8/6,5 (2.1;10.8) |
| *How much do you trust the results obtained using AI?* |  |
| 1 — Don't trust at all | 3/2,4 (0;5.2) |
| 2 — Rather don't trust | 14/11,4 (5.8;16.9) |
| 3 — Partially trust | 63/51,2 (42.4;60.1) |
| 4 — In general trust | 40/32,5 (24.2;40.8) |
| 5 — Completely trust | 3/2,4 (0;5.2) |
| Yes (give example): ___________________ | 71/57,7 (48.9;66.5) |
| No | 52/42,3 (33.6;51.0) |
| *The AI component adequately uses biostatistical terminology:* | |
| Yes | 26/21,1 (13.9;28.4) |
| Rather yes | 73/59,3 (50.7;68.0) |
| Rather no | 20/16,3 (9.7;22.8) |
| No | 4/3,3 (0.1;63.9) |
| Completely agree | 27/22 (14.6;29.3) |
| Mostly agree | 71/57,7 (48.9;66.5) |
| disagree | 19/15,4 (9.1;21.8) |
| Disagree | 6/4,9 (1.1;86.9) |
| Yes | 42/34,1 (25.8;42.5) |
| Mostly yes | 52/42,3 (33.6;51.0) |
| Mostly no | 18/14,6 (8.4;20.9) |
| No | 11/8,9 (3.9;13.9) |
| *The use of AI reduced the need to consult a teacher:* |  |
| Significantly | 40/32,5 (24.2;40.8) |
| Insignificantly | 51/41,5 (32.8;50.2) |
| No effect | 26/21,1 (13.9;28.4) |
| Increased the need for consultations | 6/4,9 (1.1;86.9) |
| Yes | 51/41,5 (32.8;50.2) |
| Partially | 64/52 (43.2;60.9) |
| No | 8/6,5 (2.1;10.8) |
| Never | 28/22,8 (15.4;30.2) |
| Rarely | 81/65,9 (57.5;74.2) |
| Often | 11/8,9 (3.9;13.9) |
| Constantly | 3/2,4 (0;5.2) |
| Significantly increased | 38/30,9 (22.7;39.1) |
| Slightly increased | 60/48,8 (39.9;57.6) |
| No effect | 22/17,9 (11.1;24.7) |
| Decreased | 3/2,4 (0;5.2) |
| Completely acceptable | 44/35,8 (27.3;44.2) |
| Acceptable under teacher supervision | 59/48 (39.1;56.8) |
| Rather unacceptable | 13/10,6 (5.1;16.0) |
| Unacceptable | 7/5,7 (15.9;97.9) |
| Yes | 55/44,7 (35.9;53.5) |
| No | 38/30,9 (22.7;39.1) |
| Difficult to answer | 30/24,4 (16.8;31.9) |

Section 6. Teachers' Opinions on the Process of Creating an Electronic Course Using SAM Technology

Supplementary Table 5. Developers’ opinions about SAM technology

| (n=9) | Count / % |
| --- | --- |
| I have a good understanding of the main stages of the SAM model |  |
| 1 – Strongly disagree |  |
| 2 – Somewhat disagree |  |
| 3 – Not sure / Undecided | 4/44,4 |
| 4 – Somewhat agree | 3/33,3 |
| 5 – Strongly agree | 2/22,2 |
| I understand the principles of interactive development |  |
| 1 – Strongly disagree |  |
| 2 – Somewhat disagree |  |
| 3 – Not sure / Undecided | 4/44,4 |
| 4 – Somewhat agree | 4/44,4 |
| 5 – Strongly agree | 1/11,1 |
| I have enough information to apply SAM in practice |  |
| 1 – Strongly disagree |  |
| 2 – Somewhat disagree | 1/11,1 |
| 3 – Not sure / Undecided | 4/44,4 |
| 4 – Somewhat agree | 2/22,2 |
| 5 – Strongly agree | 2/22,2 |
| SAM improves the quality of electronic textbooks |  |
| 1 – Strongly disagree |  |
| 2 – Somewhat disagree | 1/11,1 |
| 3 – Not sure / Undecided | 1/11,1 |
| 4 – Somewhat agree | 4/44,4 |
| 5 – Strongly agree | 3/33,3 |
| The iterative approach allows errors to be corrected in a timely manner. |  |
| 1 – Strongly disagree |  |
| 2 – Somewhat disagree | 1/11,1 |
| 3 – Not sure / Undecided |  |
| 4 – Somewhat agree | 6/66,7 |
| 5 – Strongly agree | 2/22,2 |
| The model contributes to a clearer structure of the teaching material. |  |
| 1 – Strongly disagree |  |
| 2 – Somewhat disagree |  |
| 3 – Not sure / Undecided | 4/44,4 |
| 4 – Somewhat agree | 5/55,6 |
| 5 – Strongly agree |  |
| SAM improves interaction between developers and teachers |  |
| 1 – Strongly disagree |  |
| 2 – Somewhat disagree | 1/11,1 |
| 3 – Not sure / Undecided | 4/44,4 |
| 4 – Somewhat agree | 3/33,3 |
| 5 – Strongly agree | 1/11,1 |
| My educational institution has the conditions necessary to implement SAM |  |
| 1 – Strongly disagree |  |
| 2 – Somewhat disagree |  |
| 3 – Not sure / Undecided | 3/33,3 |
| 4 – Somewhat agree | 5/55,6 |
| 5 – Strongly agree | 1/11,1 |
| Using SAM does not require excessive time investment |  |
| 1 – Strongly disagree |  |
| 2 – Somewhat disagree | 1/11,1 |
| 3 – Not sure / Undecided | 4/44,4 |
| 4 – Somewhat agree | 2/22,2 |
| 5 – Strongly agree | 2/22,2 |
| I am prepared to apply the SAM model in the future |  |
| 1 – Strongly disagree |  |
| 2 – Somewhat disagree | 1/11,1 |
| 3 – Not sure / Undecided | 3/33,3 |
| 4 – Somewhat agree | 3/33,3 |
| 5 – Strongly agree | 2/22,2 |
| Lack of methodological training hinders the application of SAM |  |
| 1 – Strongly disagree |  |
| 2 – Somewhat disagree |  |
| 3 – Not sure / Undecided | 3/33,3 |
| 4 – Somewhat agree | 5/55,6 |
| 5 – Strongly agree | 1/11,1 |
| Technical difficulties hinder the development of electronic textbooks on SAM |  |
| 1 – Strongly disagree |  |
| 2 – Somewhat disagree | 2/22,2 |
| 3 – Not sure / Undecided | 1/11,1 |
| 4 – Somewhat agree | 5/55,6 |
| 5 – Strongly agree | 1/11,1 |
| Additional training of teachers in this technology is necessary |  |
| 1 – Strongly disagree |  |
| 2 – Somewhat disagree | 1/11,1 |
| 3 – Not sure / Undecided | 1/11,1 |
| 4 – Somewhat agree | 6/66,7 |
| 5 – Strongly agree | 1/11,1 |
| The introduction of SAM is appropriate in the higher education system. |  |
| 1 – Strongly disagree |  |
| 2 – Somewhat disagree | 1/11,1 |
| 3 – Not sure / Undecided | 1/11,1 |
| 4 – Somewhat agree | 5/55,6 |
| 5 – Strongly agree | 2/22,2 |
| I would recommend using SAM to my colleagues. |  |
| 1 – Strongly disagree |  |
| 2 – Somewhat disagree | 1/11,1 |
| 3 – Not sure / Undecided | 2/22,2 |
| 4 – Somewhat agree | 3/33,3 |
| 5 – Strongly agree | 3/33,3 |
| Assess how significant each of the listed advantages is when creating an electronic textbook. | |
| Iterative development (step-by-step refinement of the product) |  |
| 1 – Completely insignificant |  |
| 2 – Insignificant |  |
| 3 – Moderately significant | 3/33,3 |
| 4 – Significant | 6/66,6 |
| 5 – Very significant |  |
| Possibility of quick feedback |  |
| 1 – Completely insignificant | 1/11,1 |
| 2 – Insignificant | 1/11,1 |
| 3 – Moderately significant | 4/44,4 |
| 4 – Significant | 3/33,3 |
| 5 – Very significant |  |
| Flexibility to make changes at any stage |  |
| 1 – Completely insignificant | 1/11,1 |
| 2 – Insignificant |  |
| 3 – Moderately significant | 2/22,2 |
| 4 – Significant | 5/55,6 |
| 5 – Very significant | 2/22,2 |
| Improved quality of the final electronic textbook |  |
| 1 – Completely insignificant |  |
| 2 – Insignificant |  |
| 3 – Moderately significant | 3/33,3 |
| 4 – Significant | 4/44,4 |
| 5 – Very significant | 2/22,2 |
| Reduced risk of serious methodological errors |  |
| 1 – Completely insignificant |  |
| 2 – Insignificant | 1/11,1 |
| 3 – Moderately significant | 4/44,4 |
| 4 – Significant | 3/33,3 |
| 5 – Very significant | 1/11,1 |
| Improved interaction between development participants |  |
| 1 – Completely insignificant |  |
| 2 – Insignificant |  |
| 3 – Moderately significant | 4/44,4 |
| 4 – Significant | 4/44,4 |
| 5 – Very significant | 1/11,1 |
| Time savings due to early detection of shortcomings |  |
| 1 – Completely insignificant |  |
| 2 – Insignificant | 1/11,1 |
| 3 – Moderately significant | 2/22,2 |
| 4 – Significant | 3/33,3 |
| 5 – Very significant | 3/33,3 |
| Improved adaptability of teaching materials to the needs of learners |  |
| 1 – Completely insignificant |  |
| 2 – Insignificant |  |
| 3 – Moderately significant | 3/33,3 |
| 4 – Significant | 5/55,6 |
| 5 – Very significant | 1/11,1 |
